# Supplementary material
Source: PubMed Central journal article supplement (PMC8525658)
Supplement: NIHMS1711534-supplement-Supplement1.pdf [file NIHMS1711534-supplement-Supplement1.pdf]

1 SUPPLEMENTARY INFORMATION

2

3 **Low Temperature Thermal Treatment of Gas-Phase Fluorotelomer Alcohols by Calcium**  
4 **Oxide**

5

6 Theran P. Riedel\*, M. Ariel Geer Wallace, Erin P. Shields, Chun Wai Lee, William P. Linak,  
7 Jeffrey V. Ryan

8

9 Air Methods and Characterization Division, Center for Environmental Measurement and  
10 Modeling, United States Environmental Protection Agency, Research Triangle Park, North  
11 Carolina, 27711, United States

12

13

14 \*Corresponding Author

15 Email: [riedel.theran@epa.gov](mailto:riedel.theran@epa.gov)

16 Phone: 919-541-0877

17

18 No. of pages: 12

19 No. of figures: 10

20 No. of tables: 1

21

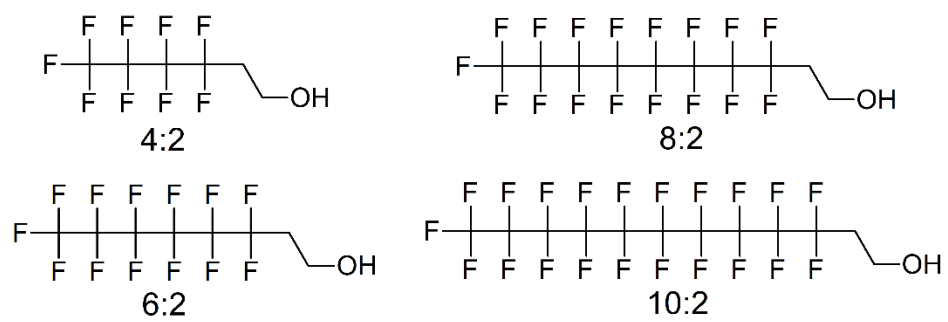

22

23

24 **Figure S1.** The fluorotelomer alcohols (FTOHs) examined in this study.

25

26

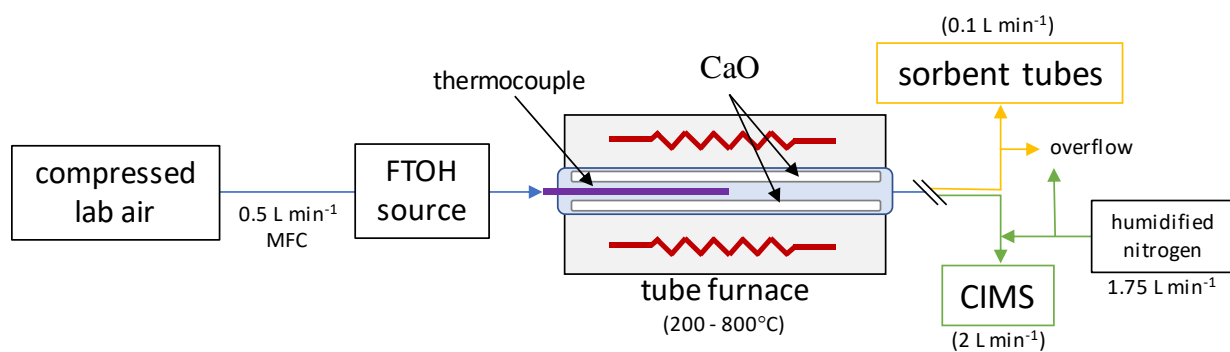

27

28

29 **Figure S2.** Experimental setup. Green conditions and flow paths are used during CIMS sampling.

30 Yellow conditions and flow paths are used during sorbent tube sampling for TD-GC/MS. Flow

31 rates within parentheses are pull rates, and those not in parentheses are push rates.

32

33  
34

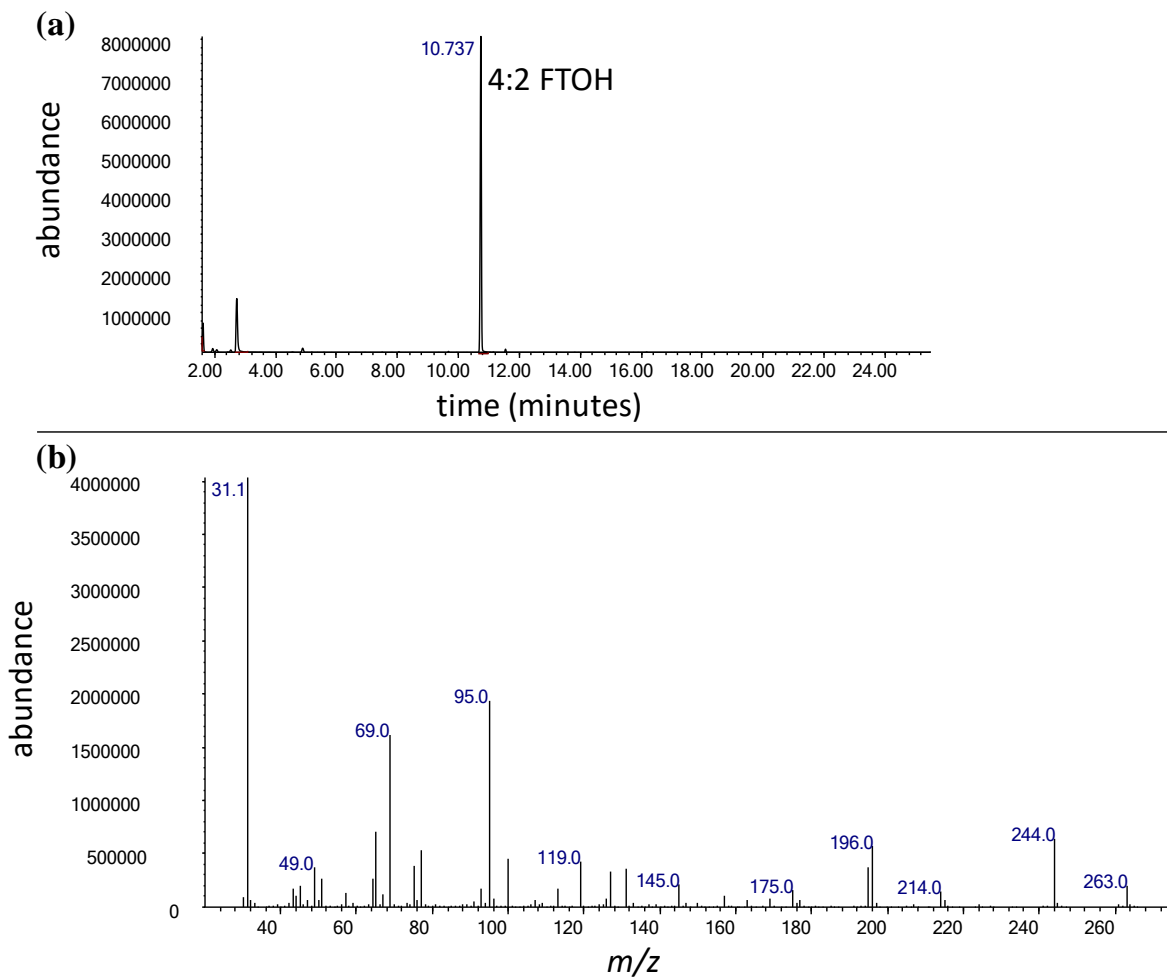

35  
36  
37  
38  
39

**Figure S3.** TD-GC/MS data for 4:2 FTOH. (a) SIM chromatogram for 4:2 FTOH sampling at 250 °C. (b) Mass spectrum for 4:2 FTOH sampling at 250 °C.

40

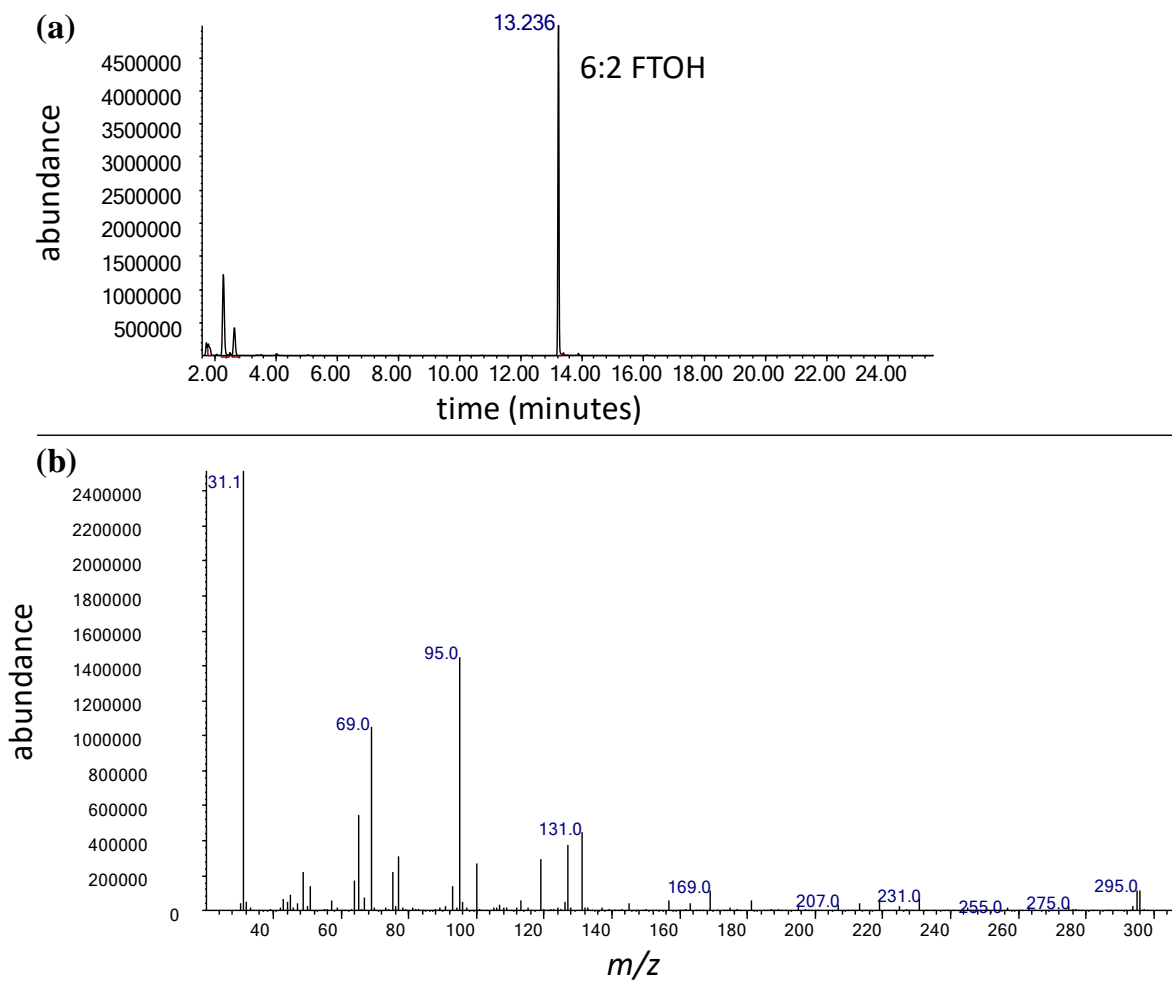

41

42

43 **Figure S4.** TD-GC/MS data for 6:2 FTOH. (a) SIM chromatogram for 6:2 FTOH sampling at 250

44 °C. (b) Mass spectrum for 6:2 FTOH sampling at 250 °C.

45

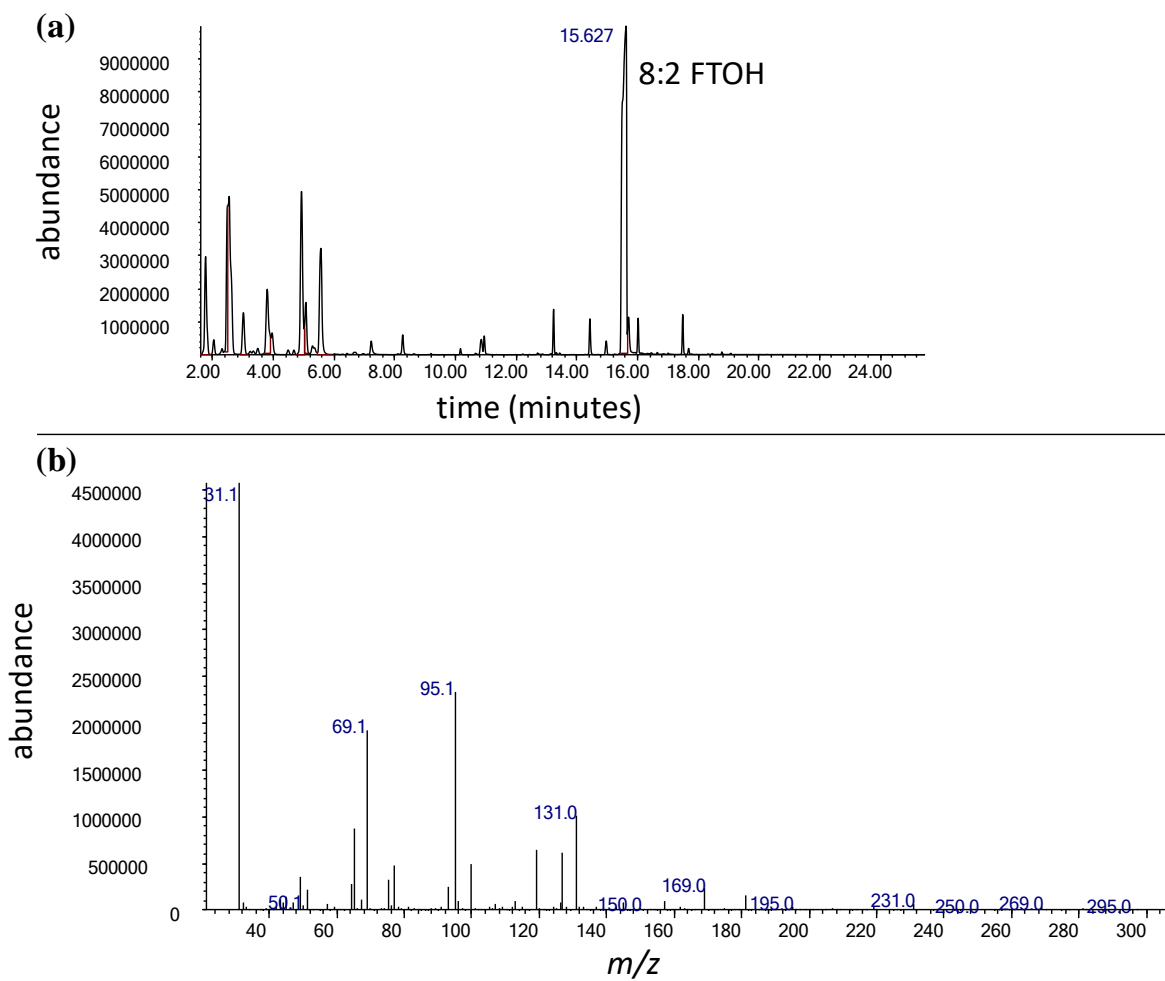

47

48

49 **Figure S5.** TD-GC/MS data for 8:2 FTOH. (a) SIM chromatogram for 8:2 FTOH sampling at 250

50 °C. (b) Mass spectrum for 8:2 FTOH sampling at 250 °C.

51

52

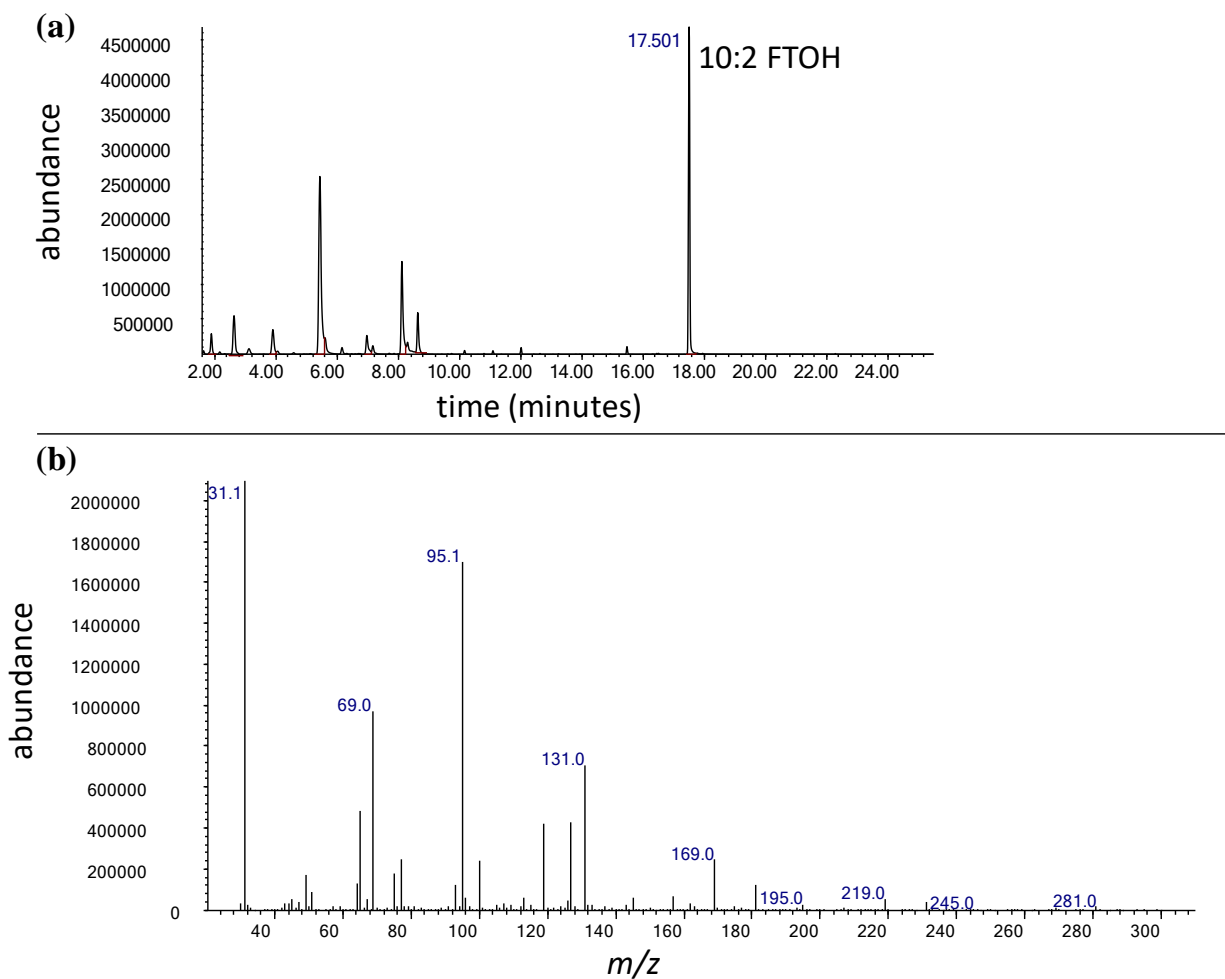

53

54

55 **Figure S6.** TD-GC/MS data for 10:2 FTOH. (a) SIM chromatogram for 10:2 FTOH sampling at

56 250 °C. (b) Mass spectrum for 10:2 FTOH sampling at 250 °C.

57

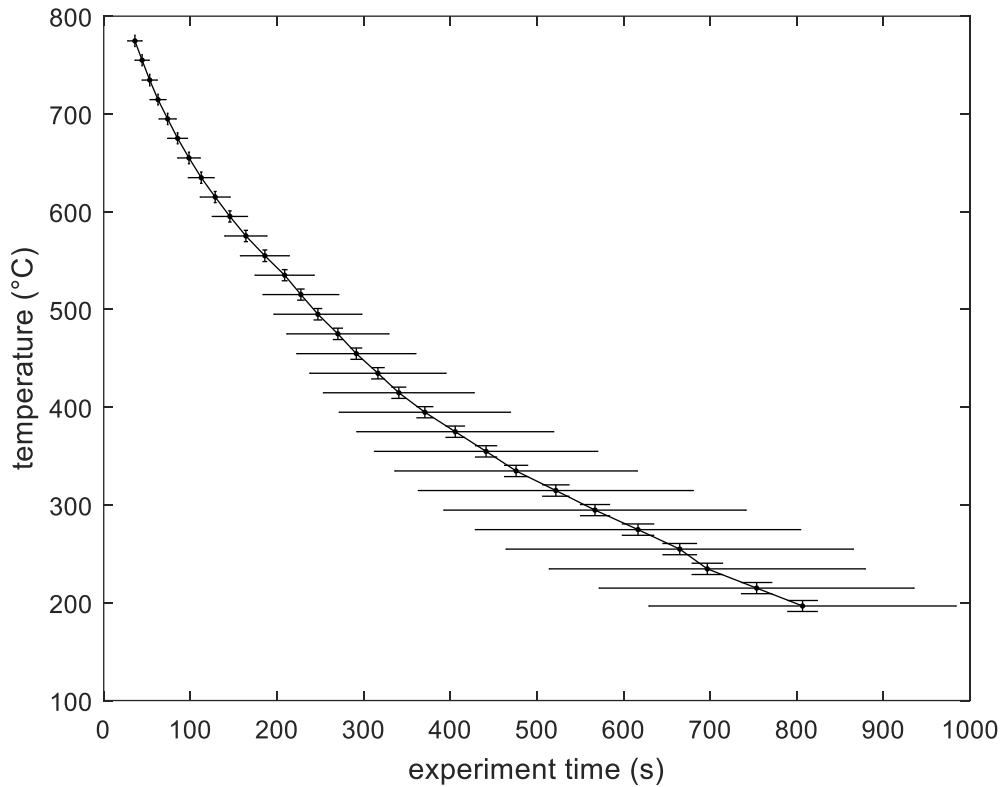

59

60

61 **Figure S7.** Temperature profile used for CIMS analysis averaged across all performed  
62 experiments. Vertical error bars are the standard deviations in the temperature bin averages.  
63 Horizontal error bars are the standard deviations in the time required to reach each temperature  
64 bin, the variability of which was subject to factors such as ambient temperature that affected the  
65 cooling rate of the furnace.

66



67

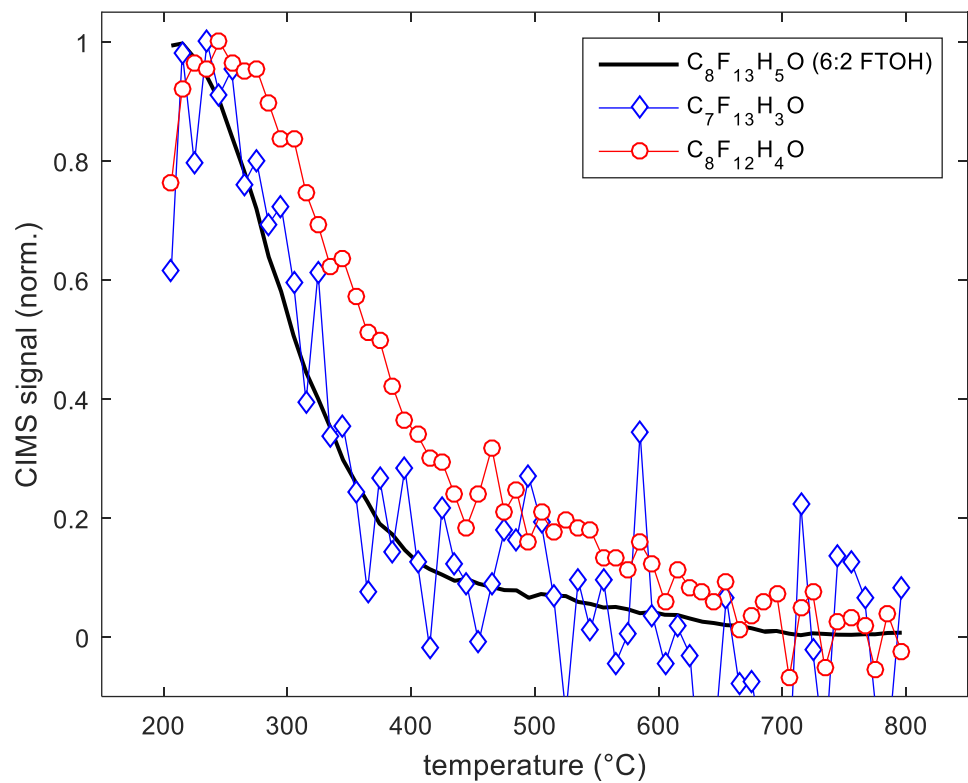

68

69

70 **Figure S8.** Temperature-dependent formation of products of incomplete destruction resulting from  
71 CaO thermal treatment of 6:2 FTOH.

72

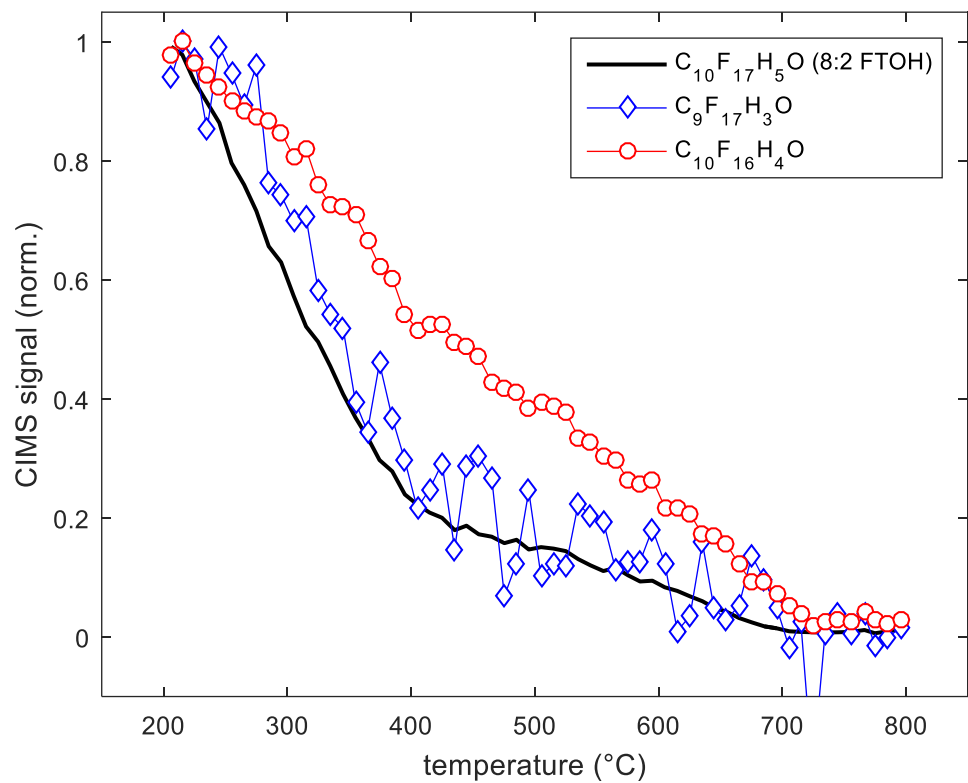

74

75

76 **Figure S9.** Temperature-dependent formation of products of incomplete destruction resulting from  
77 CaO thermal treatment of 8:2 FTOH.

78

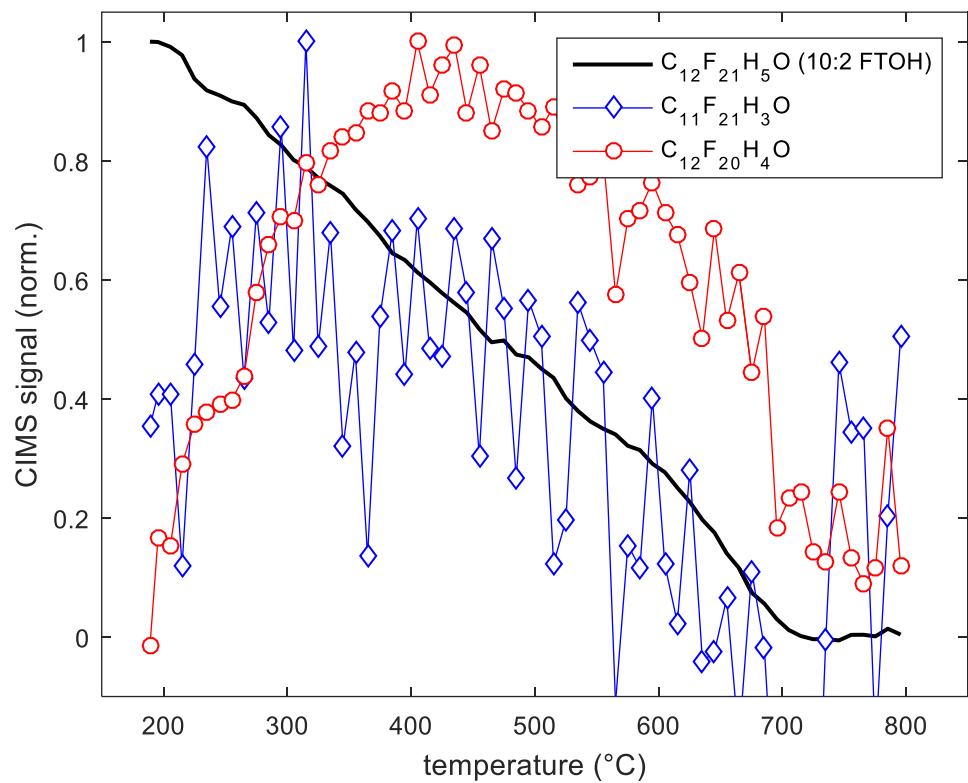

80

81

82 **Figure S10.** Temperature-dependent formation of products of incomplete destruction resulting  
83 from CaO thermal treatment of 10:2 FTOH.

84

85  
86  
87  
88

**Table S1.** Select TD-GC/MS extracted ion chromatogram areas from suspected PFAS products of incomplete destruction at various treatment temperatures.

| FTOH | retention time (min) | m/z       | EIC area  |           |           |           |           |           |           |           |
|------|----------------------|-----------|-----------|-----------|-----------|-----------|-----------|-----------|-----------|-----------|
|      |                      |           | 250 °C    | 300 °C    | 350 °C    | 400 °C    | 500 °C    | 600 °C    | 700 °C    | 800 °C    |
| 4:2  | 1.63                 | 69        | 9.086E+05 | 1.066E+06 | 7.252E+05 | -         | -         | 9.595E+03 | -         | -         |
|      | 1.63                 | 75        | 4.283E+06 | 5.049E+06 | 3.295E+06 | -         | -         | 3.592E+04 | 5.147E+03 | -         |
|      | 2.06                 | 69        | 1.675E+05 | 2.204E+05 | 3.144E+05 | -         | 3.192E+04 | 1.189E+04 | 1.323E+04 | 1.596E+03 |
| 6:2  | 1.89                 | 75        | 8.554E+05 | 1.064E+06 | 7.599E+05 | 4.507E+05 | 4.200E+04 | 1.378E+04 | 2.308E+03 | -         |
|      | 2.33                 | 95        | 3.385E+06 | 8.967E+06 | 1.407E+07 | 5.534E+06 | 9.732E+05 | 3.269E+05 | 1.794E+05 | 7.180E+02 |
|      | 2.68                 | 75        | 6.082E+06 | 4.048E+06 | 2.446E+06 | 1.538E+06 | 2.407E+05 | 1.153E+05 | 8.289E+03 | -         |
|      | 4.05                 | 77        | 7.051E+05 | 6.589E+05 | 6.984E+05 | 5.572E+05 | 1.002E+05 | 1.130E+05 | 1.753E+05 | -         |
| 8:2  | 1.84                 | 69        | 1.225E+07 | 2.263E+07 | 2.434E+07 | 1.908E+07 | 1.129E+06 | 2.371E+05 | -         | -         |
|      | 2.13                 | 69        | 1.580E+06 | 3.683E+06 | 5.079E+06 | 6.723E+06 | 9.646E+05 | 2.702E+05 | 2.017E+04 | 9.620E+02 |
|      | 2.13                 | 113       | 2.742E+06 | 6.405E+06 | 1.054E+07 | 1.607E+07 | 2.415E+06 | 5.875E+05 | 3.097E+04 | -         |
|      | 2.62                 | 69        | -         | -         | 5.250E+07 | 4.370E+07 | 3.968E+06 | 8.911E+05 | 1.253E+05 | 2.111E+03 |
|      | 3.10                 | 113       | 1.680E+07 | 2.564E+07 | 2.540E+07 | 1.485E+07 | 1.038E+06 | 2.026E+05 | 1.197E+04 | -         |
|      | 3.87                 | 69        | 1.175E+07 | 1.453E+07 | 1.429E+07 | 9.520E+06 | 4.512E+05 | 1.080E+05 | 1.374E+04 | -         |
|      | 4.03                 | 75        | 1.007E+07 | 2.459E+07 | 2.189E+07 | 1.124E+07 | 1.006E+06 | 3.232E+05 | 6.748E+03 | -         |
|      | 4.55                 | 113       | 2.171E+06 | 5.527E+06 | 9.749E+06 | 8.140E+06 | 7.230E+05 | 1.026E+05 | 4.075E+03 | -         |
|      | 5.62                 | 75        | 4.962E+07 | 6.026E+07 | 5.149E+07 | 3.540E+07 | 6.810E+06 | 2.512E+06 | 5.657E+04 | 3.868E+04 |
| 7.25 | 77                   | 1.147E+07 | 1.266E+07 | 1.542E+07 | 1.718E+07 | 3.279E+06 | 2.714E+06 | 5.836E+05 | -         |           |
| 10:2 | 1.76                 | 131       | 3.286E+05 | 1.337E+06 | 9.308E+05 | 5.198E+05 | -         | -         | -         | -         |
|      | 1.88                 | 69        | 9.351E+05 | 2.478E+06 | 2.530E+06 | 1.586E+06 | 1.147E+05 | 2.363E+04 | -         | -         |
|      | 2.15                 | 113       | 1.676E+05 | 7.898E+05 | 1.510E+06 | 1.417E+06 | 1.988E+05 | 3.941E+04 | -         | -         |
|      | 2.60                 | 69        | 2.475E+06 | 4.104E+06 | 3.958E+06 | 2.039E+06 | 1.726E+05 | 4.029E+04 | -         | 1.161E+04 |
|      | 3.08                 | 131       | 1.640E+06 | 5.319E+06 | 5.677E+06 | 3.200E+06 | 2.876E+06 | 1.518E+06 | 4.876E+04 | -         |
|      | 3.89                 | 69        | 1.696E+06 | 3.942E+06 | 4.604E+06 | 2.429E+06 | 2.025E+05 | 4.936E+04 | -         | -         |
|      | 4.56                 | 113       | 3.192E+05 | 8.999E+05 | 1.766E+06 | 2.039E+06 | 4.451E+05 | 1.502E+05 | 7.080E+03 | -         |
|      | 5.42                 | 69        | 1.398E+07 | 1.900E+07 | 1.939E+07 | 1.064E+07 | 8.347E+05 | 2.016E+05 | 2.125E+04 | -         |
|      | 6.15                 | 113       | 1.420E+06 | 2.232E+06 | 2.437E+06 | 1.236E+06 | 1.592E+05 | 3.823E+04 | 1.514E+03 | -         |
|      | 6.96                 | 69        | 1.316E+06 | 1.580E+06 | 1.257E+06 | 6.146E+05 | -         | -         | 4.529E+03 | -         |
|      | 7.09                 | 113       | 3.130E+05 | 6.624E+05 | 8.894E+05 | 5.032E+05 | 6.419E+04 | 1.490E+04 | -         | -         |
|      | 7.16                 | 75        | 1.553E+06 | 2.959E+06 | 1.713E+06 | 8.442E+05 | 1.322E+05 | 6.145E+04 | 1.105E+03 | -         |
|      | 7.70                 | 113       | 1.880E+05 | 5.218E+05 | 8.718E+05 | 6.321E+05 | 1.072E+05 | 1.501E+04 | -         | -         |
|      | 8.11                 | 95        | 4.639E+06 | 1.509E+07 | 3.031E+07 | 2.106E+07 | 5.170E+06 | 2.051E+06 | 2.153E+05 | -         |
| 8.63 | 75                   | 7.623E+06 | 9.283E+06 | 6.157E+06 | 3.527E+06 | 9.126E+05 | 6.576E+05 | 8.464E+03 | -         |           |

89  
90  
91  
92

\*Temperatures are approximate. Retention times are averaged across all temperatures sampled.
